# Supplementary material for: Visualization of Synthetic Vascular Smooth Muscle Cells in Atherosclerotic Carotid Rat Arteries by F-18 FDG PET
Source: PubMed Central journal article supplement (PMC5539104; doi:10.1038/s41598-017-07073-3), 2017-08-01
Supplement: 41598_2017_7073_MOESM1_ESM.pdf [file 41598_2017_7073_MOESM1_ESM.pdf]

# Supplementary Information

## Visualization of Synthetic Vascular Smooth Muscle Cells in Atherosclerotic Carotid Rat Arteries by F-18 FDG PET

Kisoo Pahk<sup>1,2</sup>, Chanmin Joung<sup>1</sup>, Se-Mi Jung<sup>1</sup>, Hwa Young Song<sup>1</sup>, Ji Yong Park<sup>3,4</sup>, Jung Woo Byun<sup>3</sup>, Yun-Sang Lee<sup>3,5</sup>, Jin Chul Paeng<sup>6</sup>, Chunsook Kim<sup>7</sup>, Sungeun Kim<sup>2\*\*</sup>, and Won-Ki Kim<sup>1\*</sup>

<sup>1</sup>*Department of Neuroscience, Korea University College of Medicine, Seoul, Korea;*

<sup>2</sup>*Department of Nuclear Medicine, Korea University Anam Hospital, Seoul, Korea;*

<sup>3</sup>*Department of Nuclear Medicine, Seoul National University College of Medicine, Seoul, Korea;*

<sup>4</sup>*Department of Biomedical Sciences, Seoul National University Graduate School, Seoul, Korea;*

<sup>5</sup>*Department of Molecular Medicine and Biopharmaceutical Sciences, Graduate School of Convergence Science and Technology, and College of Medicine, Seoul National University, Seoul, Korea;*

<sup>6</sup>*Department of Nuclear Medicine, Seoul National University Hospital, Seoul, Korea;*

<sup>7</sup>*Department of Nursing, Kyungdong University, Wonju, Korea*

**\*Corresponding Author:**

Won-Ki Kim, Ph.D.

Professor, Department of Neuroscience

Korea University College of Medicine

126-1, Anam-Dong 5-Ga, Seongbuk-Gu, Seoul 136-705, Korea

Tel: 82-2-2286-1095, Fax: 82-2-953-6095, E-mail: [wonki@korea.ac.kr](mailto:wonki@korea.ac.kr)

**\*\* Co-corresponding Author:**

Sungeun Kim, M.D., Ph.D.

Professor, Department of Nuclear Medicine

Korea University Anam Hospital

126-1, Anam-Dong 5-Ga, Seongbuk-Gu, Seoul 136-705, Korea

Tel: 82-2-920-5540, Fax: 82-2-921-2971, E-mail: [seiong@korea.ac.kr](mailto:seiong@korea.ac.kr)

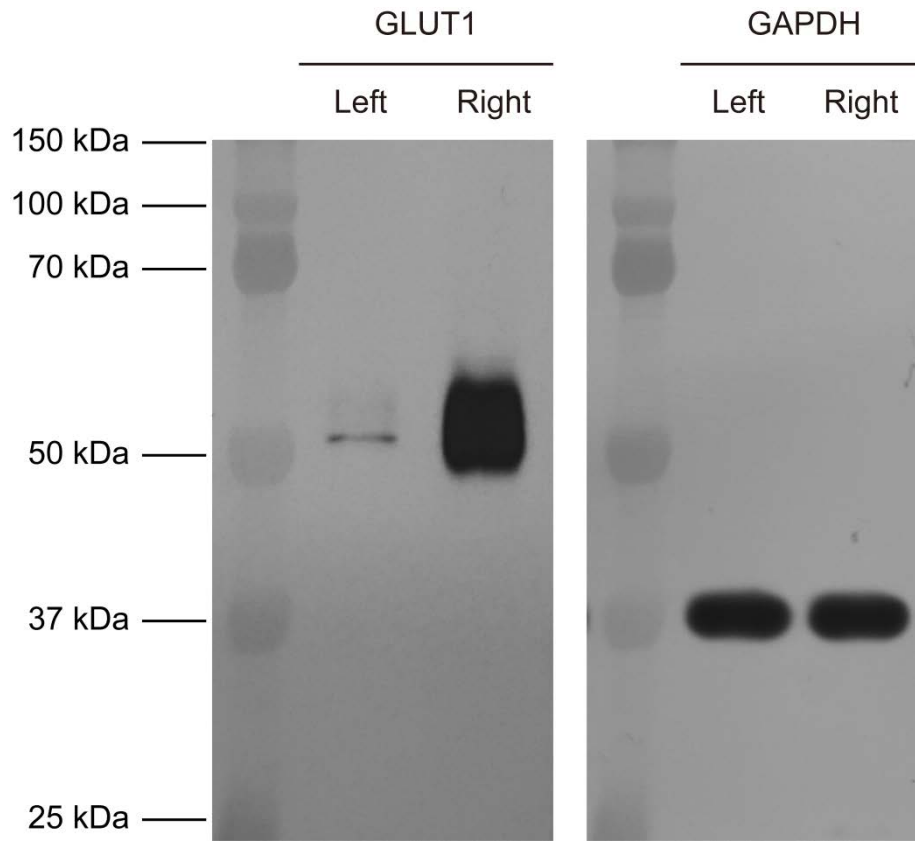

**Supplementary Figure 1.** Immunoblot images of GLUT1 and GAPDH expressions. The cropped images are shown in Figure 6B.
